# Supplementary material for: The Role of Success and Failure in Fluid Teams: Evidence from the Motion Picture Industry
Source: Atypon-hosted journal article supplement (doi:10.1287/mnsc.2023.03756), 2026-01-27
Supplement: mnsc.2023.03756.sm1.pdf [file mnsc.2023.03756.sm1.pdf]

# **The Role of Success and Failure in Fluid Teams—Evidence from the Motion Picture Industry**

**Suresh Muthulingam**

Smeal College of Business, The Pennsylvania State University, University Park, Pennsylvania 16802,

[sxm84@psu.edu](mailto:sxm84@psu.edu)

**Kumar Rajaram**

Anderson School of Management, University of California, Los Angeles, Los Angeles, California 90095

[kumar.rajaram@anderson.ucla.edu](mailto:kumar.rajaram@anderson.ucla.edu)

## Online Appendix

Here, we present additional analyses that supplement the main analysis reported in the paper.

**Table A1: First-Stage Regression Results with Instrumental Variable**

| Dependent Variable →                                        | Team History            | Team History—Positive   |                      | Team History/Budget      | Team History/Budget—Positive |                          |
|-------------------------------------------------------------|-------------------------|-------------------------|----------------------|--------------------------|------------------------------|--------------------------|
|                                                             | (1)                     | (2)                     | (3)                  | (4)                      | (5)                          | (6)                      |
| Average Team History — Rating ( $\beta_1$ )                 | -10.063***<br>(3.036)   |                         |                      |                          |                              |                          |
| Average Team History — Genre ( $\beta_2$ )                  | -1.041***<br>(0.286)    |                         |                      |                          |                              |                          |
| Average Team History—Positive—Rating ( $\beta_3$ )          |                         | -9.157***<br>(2.746)    | -9.158***<br>(2.748) |                          |                              |                          |
| Average Team History—Positive—Genre ( $\beta_4$ )           |                         | -0.735**<br>(0.238)     | -0.736**<br>(0.238)  |                          |                              |                          |
| Team History—Negative ( $\beta_5$ )                         |                         | 1.283***<br>(0.170)     | 1.282***<br>(0.170)  |                          |                              |                          |
| Team—CV ( $\beta_6$ )                                       |                         |                         |                      |                          | 0.034<br>(0.088)             |                          |
| Average Team History/ Budget — Rating ( $\beta_7$ )         |                         |                         |                      | -26.107***<br>(4.916)    |                              |                          |
| Average Team History/Budget — Genre ( $\beta_8$ )           |                         |                         |                      | -2.649***<br>(0.613)     |                              |                          |
| Average Team History/Budget—Positive—Rating ( $\beta_9$ )   |                         |                         |                      |                          | -25.872***<br>(4.649)        | -25.871***<br>(4.651)    |
| Average Team History/Budget—Positive—Genre ( $\beta_{10}$ ) |                         |                         |                      |                          | -2.618***<br>(0.603)         | -2.619***<br>(0.603)     |
| Team History/Budget—Negative ( $\beta_{11}$ )               |                         |                         |                      |                          | 1.203*<br>(0.491)            | 1.205*<br>(0.491)        |
| Team—CV/ Budget ( $\beta_{12}$ )                            |                         |                         |                      |                          |                              | -1.238<br>(2.475)        |
| <b>Controls</b>                                             |                         |                         |                      |                          |                              |                          |
| Running Time (minutes)                                      | 0.481+<br>(0.254)       | 0.406<br>(0.259)        | 0.406<br>(0.259)     | -3.067+<br>(1.720)       | -3.196+<br>(1.717)           | -3.194+<br>(1.717)       |
| Sequel                                                      | 43.545**<br>(15.397)    | 41.401**<br>(14.610)    | 41.391<br>(14.620)   | 206.372+<br>(105.764)    | 190.498+<br>(104.998)        | 190.031+<br>(105.085)    |
| Opening Weekend Theaters                                    | 0.014***<br>(0.004)     | 0.013**<br>(0.004)      | 0.0133<br>(0.004)    | -0.002<br>(0.028)        | -0.004<br>(0.028)            | -0.004<br>(0.028)        |
| Team Familiarity                                            | 5.319***<br>(1.55)      | 5.724***<br>(1.61)      | 5.7259<br>(1.61)     | 14.892<br>(9.83)         | 15.828<br>(9.94)             | 15.676<br>(9.94)         |
| Constant                                                    | 4679.80***<br>(1367.55) | 4978.69***<br>(1469.57) | 4979.60<br>(1470.34) | 28135.88***<br>(6416.74) | 31250.35***<br>(6167.12)     | 31250.43***<br>(6170.44) |
| <b>Fixed Effects</b>                                        |                         |                         |                      |                          |                              |                          |
| Year                                                        | Yes                     | Yes                     | Yes                  | Yes                      | Yes                          | Yes                      |
| Distributor                                                 | Yes                     | Yes                     | Yes                  | Yes                      | Yes                          | Yes                      |
| Genre                                                       | Yes                     | Yes                     | Yes                  | Yes                      | Yes                          | Yes                      |
| Rating                                                      | Yes                     | Yes                     | Yes                  | Yes                      | Yes                          | Yes                      |
| F-Statistic                                                 | 38.7                    | 31.1                    | 31.1                 | 71.1                     | 67.8                         | 67.8                     |
| Adjusted R-Square                                           | 0.632                   | 0.714                   | 0.714                | 0.725                    | 0.737                        | 0.738                    |
| Number                                                      | 2,091                   | 2,091                   | 2,091                | 2,091                    | 2,091                        | 2,091                    |

+  $p < 0.10$ , \*  $p < 0.05$ , \*\*  $p < 0.01$ , \*\*\*  $p < 0.001$ . We report coefficient estimates with robust standard errors in parentheses. @ Team History (Team History/ Budget) is instrumented with the average team history (team history/ budget) of other movies produced in the same year with the same rating as the focal movie and the average team history (team history/ budget) of other movies produced in the same year belonging to the same genre as the focal movie. # Team History—Positive (Team History/ Budget—Positive) is instrumented with the average team history (team history/ budget—positive) of other movies produced in the same year with the same rating as the focal movie and the average team history (team history/ budget—positive) of other movies produced in the same year belonging to the same genre as the focal movie.

**Table A2: Regression Results with Non-Normalized Dependent Variable and Normalized Independent Variables**

| Dependent Variable →                       | Movie Profit (million USD) |                      |                      |
|--------------------------------------------|----------------------------|----------------------|----------------------|
|                                            | (1)                        | (2)                  | (3)                  |
| Team History/Budget ( $\beta_1$ )          | 0.006***<br>(0.001)        |                      |                      |
| Team History/Budget—Positive ( $\beta_2$ ) |                            | 0.007***<br>(0.001)  | 0.007***<br>(0.001)  |
| Team History/Budget—Negative ( $\beta_3$ ) |                            | -0.080***<br>(0.016) | -0.080***<br>(0.016) |
| Team CV/ Budget ( $\beta_4$ )              |                            |                      | 0.119<br>(0.111)     |
| <b>Controls</b>                            |                            |                      |                      |
| Running Time (minutes)                     | 0.370***<br>(0.111)        | 0.404***<br>(0.112)  | 0.404***<br>(0.112)  |
| Sequel                                     | 21.122***<br>(6.181)       | 21.812***<br>(6.162) | 21.860***<br>(6.163) |
| Opening Weekend Theaters                   | 0.011***<br>(0.002)        | 0.012***<br>(0.002)  | 0.012***<br>(0.002)  |
| Team Familiarity                           | 1.187*<br>(0.580)          | 1.201*<br>(0.578)    | 1.217*<br>(0.577)    |
| Constant                                   | -48.048+<br>(25.267)       | -53.954*<br>(25.382) | -54.063*<br>(25.386) |
| <b>Fixed Effects</b>                       |                            |                      |                      |
| Year                                       | Yes                        | Yes                  | Yes                  |
| Distributor                                | Yes                        | Yes                  | Yes                  |
| Genre                                      | Yes                        | Yes                  | Yes                  |
| Rating                                     | Yes                        | Yes                  | Yes                  |
| Adjusted R-Square                          | 0.104                      | 0.111                | 0.111                |
| Number                                     | 2,091                      | 2,091                | 2,091                |

+  $p < 0.10$ , \*  $p < 0.05$ , \*\*  $p < 0.01$ , \*\*\*  $p < 0.001$ . We report coefficient estimates with robust standard errors in parentheses.

**Table A3: Regression Results with PSM (NN5)**

| Dependent Variable →                       | Movie Profit<br>(million USD) |                       |                       | Movie Profit / Budget<br>(Percent) |                      |                      |
|--------------------------------------------|-------------------------------|-----------------------|-----------------------|------------------------------------|----------------------|----------------------|
|                                            | (1)                           | (2)                   | (3)                   | (4)                                | (5)                  | (6)                  |
| Team History ( $\beta_1$ )                 | 0.086***<br>(0.023)           |                       |                       |                                    |                      |                      |
| Team History—Positive ( $\beta_2$ )        |                               | 0.099***<br>(0.022)   | 0.098***<br>(0.022)   |                                    |                      |                      |
| Team History—Negative ( $\beta_3$ )        |                               | -0.413***<br>(0.056)  | -0.414***<br>(0.056)  |                                    |                      |                      |
| Team CV ( $\beta_4$ )                      |                               |                       | 0.030<br>(0.034)      |                                    |                      |                      |
| Team History/Budget ( $\beta_5$ )          |                               |                       |                       | 0.075**<br>(0.024)                 |                      |                      |
| Team History/Budget—Positive ( $\beta_6$ ) |                               |                       |                       |                                    | 0.087***<br>(0.025)  | 0.087***<br>(0.025)  |
| Team History/Budget—Negative ( $\beta_7$ ) |                               |                       |                       |                                    | -1.093***<br>(0.263) | -1.092***<br>(0.263) |
| Team CV/ Budget ( $\beta_8$ )              |                               |                       |                       |                                    |                      | -0.445<br>(0.530)    |
| <b>Controls</b>                            |                               |                       |                       |                                    |                      |                      |
| Running Time (minutes)                     | 0.285<br>(0.273)              | 0.433<br>(0.273)      | 0.433<br>(0.273)      | -2.143<br>(1.319)                  | -1.306<br>(1.164)    | -1.325<br>(1.166)    |
| Sequel                                     | 10.543<br>(7.501)             | 10.116<br>(7.257)     | 10.007<br>(7.246)     | -57.467<br>(43.766)                | -51.484<br>(42.855)  | -49.450<br>(42.669)  |
| Opening Weekend Theaters                   | 0.015**<br>(0.005)            | 0.016***<br>(0.005)   | 0.016***<br>(0.005)   | -0.027<br>(0.053)                  | -0.024<br>(0.052)    | -0.025<br>(0.052)    |
| Team Familiarity                           | -0.072<br>(0.808)             | 0.070<br>(0.735)      | 0.077<br>(0.734)      | -0.636<br>(3.675)                  | 0.406<br>(3.887)     | -0.468<br>(3.972)    |
| Constant                                   | -81.153+<br>(43.288)          | -100.991*<br>(42.935) | -100.974*<br>(42.945) | 360.074<br>(254.901)               | 216.919<br>(229.002) | 219.353<br>(229.393) |
| <b>Fixed Effects</b>                       |                               |                       |                       |                                    |                      |                      |
| Year                                       | Yes                           | Yes                   | Yes                   | Yes                                | Yes                  | Yes                  |
| Distributor                                | Yes                           | Yes                   | Yes                   | Yes                                | Yes                  | Yes                  |
| Genre                                      | Yes                           | Yes                   | Yes                   | Yes                                | Yes                  | Yes                  |
| Rating                                     | Yes                           | Yes                   | Yes                   | Yes                                | Yes                  | Yes                  |
| Adjusted R-Square                          | 0.227                         | 0.256                 | 0.255                 | 0.037                              | 0.046                | 0.046                |
| Number                                     | 1,526                         | 1,526                 | 1,526                 | 1,526                              | 1,526                | 1,526                |

+  $p < 0.10$ , \*  $p < 0.05$ , \*\*  $p < 0.01$ , \*\*\*  $p < 0.001$ . We report coefficient estimates with robust standard errors in parentheses.

**Table A4: Regression Results with PSM (NN1)**

| Dependent Variable →                       | Movie Profit<br>(million USD) |                       |                       | Movie Profit / Budget<br>(Percent) |                      |                      |
|--------------------------------------------|-------------------------------|-----------------------|-----------------------|------------------------------------|----------------------|----------------------|
|                                            | (1)                           | (2)                   | (3)                   | (4)                                | (5)                  | (6)                  |
| Team History ( $\beta_1$ )                 | 0.084***<br>(0.024)           |                       |                       |                                    |                      |                      |
| Team History—Positive ( $\beta_2$ )        |                               | 0.097***<br>(0.023)   | 0.097***<br>(0.023)   |                                    |                      |                      |
| Team History—Negative ( $\beta_3$ )        |                               | -0.423***<br>(0.058)  | -0.424***<br>(0.058)  |                                    |                      |                      |
| Team CV ( $\beta_4$ )                      |                               |                       | 0.021<br>(0.036)      |                                    |                      |                      |
| Team History/Budget ( $\beta_5$ )          |                               |                       |                       | 0.068*<br>(0.030)                  |                      |                      |
| Team History/Budget—Positive ( $\beta_6$ ) |                               |                       |                       |                                    | 0.081**<br>(0.029)   | 0.081**<br>(0.029)   |
| Team History/Budget—Negative ( $\beta_7$ ) |                               |                       |                       |                                    | -1.159***<br>(0.317) | -1.159***<br>(0.316) |
| Team CV/ Budget ( $\beta_8$ )              |                               |                       |                       |                                    |                      | -0.257<br>(0.552)    |
| <b>Controls</b>                            |                               |                       |                       |                                    |                      |                      |
| Running Time (minutes)                     | 0.328<br>(0.287)              | 0.492+<br>(0.287)     | 0.491+<br>(0.288)     | -2.302<br>(1.522)                  | -1.305<br>(1.300)    | -1.314<br>(1.302)    |
| Sequel                                     | 11.170<br>(7.307)             | 10.725<br>(7.120)     | 10.643<br>(7.106)     | -76.922<br>(53.392)                | -69.363<br>(52.423)  | -68.100<br>(52.006)  |
| Opening Weekend Theaters                   | 0.015**<br>(0.005)            | 0.017**<br>(0.005)    | 0.017**<br>(0.005)    | -0.055<br>(0.081)                  | -0.050<br>(0.080)    | -0.051<br>(0.080)    |
| Team Familiarity                           | -0.250<br>(0.816)             | -0.103<br>(0.747)     | -0.098<br>(0.747)     | -1.156<br>(4.456)                  | -0.133<br>(4.718)    | -0.661<br>(4.815)    |
| Constant                                   | -84.127+<br>(45.335)          | -105.379*<br>(45.019) | -105.349*<br>(45.047) | 465.565<br>(374.795)               | 301.568<br>(335.819) | 302.891<br>(336.452) |
| <b>Fixed Effects</b>                       |                               |                       |                       |                                    |                      |                      |
| Year                                       | Yes                           | Yes                   | Yes                   | Yes                                | Yes                  | Yes                  |
| Distributor                                | Yes                           | Yes                   | Yes                   | Yes                                | Yes                  | Yes                  |
| Genre                                      | Yes                           | Yes                   | Yes                   | Yes                                | Yes                  | Yes                  |
| Rating                                     | Yes                           | Yes                   | Yes                   | Yes                                | Yes                  | Yes                  |
| Adjusted R-Square                          | 0.228                         | 0.257                 | 0.257                 | 0.040                              | 0.048                | 0.047                |
| Number                                     | 1,518                         | 1,518                 | 1,518                 | 1,518                              | 1,518                | 1,518                |

+  $p < 0.10$ , \*  $p < 0.05$ , \*\*  $p < 0.01$ , \*\*\*  $p < 0.001$ . We report coefficient estimates with robust standard errors in parentheses.

Table A5: Results for Alternative Definitions of Success and Normalization with Budget

| Dependent Variable →                       | Success if Movie Profit/Budget > 5% |                          |                          | Success if Movie Profit/Budget > 10% |                          |                          | Success if Movie Profit/Budget > 15% |                          |                          | Success if Movie Profit/Budget > 20% |                          |                          |
|--------------------------------------------|-------------------------------------|--------------------------|--------------------------|--------------------------------------|--------------------------|--------------------------|--------------------------------------|--------------------------|--------------------------|--------------------------------------|--------------------------|--------------------------|
|                                            | (1)                                 | (2)                      | (3)                      | (4)                                  | (5)                      | (6)                      | (7)                                  | (8)                      | (9)                      | (10)                                 | (11)                     | (12)                     |
| Team History/Budget ( $\beta_5$ )          | 0.00034***<br>(0.00008)             |                          |                          | 0.00034***<br>(0.00007)              |                          |                          | 0.00035***<br>(0.00007)              |                          |                          | 0.00038***<br>(0.00007)              |                          |                          |
| Team History/Budget—Positive ( $\beta_6$ ) |                                     | 0.00053***<br>(0.00010)  | 0.00053***<br>(0.00010)  |                                      | 0.00053***<br>(0.00010)  | 0.00054***<br>(0.00010)  |                                      | 0.00055***<br>(0.00010)  | 0.00055***<br>(0.00010)  |                                      | 0.00056***<br>(0.00010)  | 0.00057***<br>(0.00010)  |
| Team History/Budget—Negative ( $\beta_7$ ) |                                     | -0.0048***<br>(0.00076)  | -0.0048***<br>(0.00076)  |                                      | -0.0050***<br>(0.00075)  | -0.0050***<br>(0.00075)  |                                      | -0.0051***<br>(0.00075)  | -0.0051***<br>(0.00075)  |                                      | -0.0049***<br>(0.00074)  | -0.0049***<br>(0.00074)  |
| Team—CV/ Budget ( $\beta_8$ )              |                                     |                          | 0.008<br>(0.006)         |                                      |                          | 0.009<br>(0.006)         |                                      |                          | 0.0099+<br>(0.006)       |                                      |                          | 0.011+<br>(0.006)        |
| <b>Controls</b>                            |                                     |                          |                          |                                      |                          |                          |                                      |                          |                          |                                      |                          |                          |
| Running Time (minutes)                     | -0.00160<br>(0.003)                 | 0.00009<br>(0.003)       | 0.00004<br>(0.003)       | -0.00170<br>(0.003)                  | 0.00007<br>(0.003)       | 0.00002<br>(0.003)       | -0.00290<br>(0.003)                  | -0.00110<br>(0.003)      | -0.00120<br>(0.003)      | -0.00340<br>(0.003)                  | -0.00180<br>(0.003)      | -0.00180<br>(0.003)      |
| Sequel                                     | 0.25<br>(0.16)                      | 0.29+<br>(0.16)          | 0.29+<br>(0.16)          | 0.20<br>(0.15)                       | 0.25<br>(0.16)           | 0.26<br>(0.16)           | 0.18<br>(0.15)                       | 0.22<br>(0.16)           | 0.23<br>(0.16)           | 0.15<br>(0.15)                       | 0.20<br>(0.15)           | 0.20<br>(0.15)           |
| Opening Weekend Theaters                   | 0.00032***<br>(0.000059)            | 0.00033***<br>(0.000060) | 0.00032***<br>(0.000060) | 0.00031***<br>(0.000059)             | 0.00032***<br>(0.000060) | 0.00032***<br>(0.000060) | 0.00031***<br>(0.000061)             | 0.00032***<br>(0.000061) | 0.00032***<br>(0.000061) | 0.00027***<br>(0.000060)             | 0.00028***<br>(0.000061) | 0.00028***<br>(0.000061) |
| Team Familiarity                           | 0.057**<br>(0.022)                  | 0.061**<br>(0.023)       | 0.062**<br>(0.023)       | 0.053*<br>(0.021)                    | 0.057*<br>(0.022)        | 0.058*<br>(0.023)        | 0.058**<br>(0.021)                   | 0.062**<br>(0.022)       | 0.063**<br>(0.023)       | 0.056**<br>(0.021)                   | 0.059**<br>(0.022)       | 0.061**<br>(0.022)       |
| Constant                                   | -0.66<br>(-0.68)                    | -0.99<br>(-0.68)         | -1.00<br>(-0.68)         | -0.69<br>(-0.67)                     | -1.03<br>(-0.67)         | -1.04<br>(-0.67)         | -0.74<br>(-0.67)                     | -1.08<br>(-0.67)         | -1.09<br>(-0.67)         | -0.73<br>(-0.66)                     | -1.05<br>(-0.66)         | -1.07<br>(-0.66)         |
| <b>Fixed Effects</b>                       |                                     |                          |                          |                                      |                          |                          |                                      |                          |                          |                                      |                          |                          |
| Year                                       | Yes                                 | Yes                      | Yes                      | Yes                                  | Yes                      | Yes                      | Yes                                  | Yes                      | Yes                      | Yes                                  | Yes                      | Yes                      |
| Distributor                                | Yes                                 | Yes                      | Yes                      | Yes                                  | Yes                      | Yes                      | Yes                                  | Yes                      | Yes                      | Yes                                  | Yes                      | Yes                      |
| Genre                                      | Yes                                 | Yes                      | Yes                      | Yes                                  | Yes                      | Yes                      | Yes                                  | Yes                      | Yes                      | Yes                                  | Yes                      | Yes                      |
| Rating                                     | Yes                                 | Yes                      | Yes                      | Yes                                  | Yes                      | Yes                      | Yes                                  | Yes                      | Yes                      | Yes                                  | Yes                      | Yes                      |
| Log Likelihood                             | -1301.7                             | -1281.5                  | -1280.8                  | -1315.6                              | -1293.2                  | -1292.4                  | -1317.0                              | -1294.1                  | -1293.0                  | -1325.5                              | -1304.8                  | -1303.5                  |
| Number                                     | 2,078                               | 2,078                    | 2,078                    | 2,078                                | 2,078                    | 2,078                    | 2,078                                | 2,078                    | 2,078                    | 2,078                                | 2,078                    | 2,078                    |

+  $p < 0.10$ , \*  $p < 0.05$ , \*\*  $p < 0.01$ , \*\*\*  $p < 0.001$ . We report coefficient estimates with robust standard errors in parentheses.

**Table A6: Regression Results for the Impact of Specific Roles on Movie Profits**

| Dependent Variable →                                    | Movie Profit (million USD) |            |            |
|---------------------------------------------------------|----------------------------|------------|------------|
|                                                         | (1)                        | (2)        | (3)        |
| Lead Actor—Positive ( $\beta_1$ )                       | 2.818                      |            |            |
| –Binary                                                 | (3.715)                    |            |            |
| Lead Actor History (Role) ( $\beta_2$ )                 |                            | 0.005      |            |
| –Million USD                                            |                            | (0.005)    |            |
| Lead Actor History (Role)—Positive ( $\beta_3$ )        |                            |            | 0.00936+   |
| –Million USD                                            |                            |            | (0.005)    |
| Lead Actor History (Role)—Negative ( $\beta_4$ )        |                            |            | -0.0561*** |
| –Million USD                                            |                            |            | (0.015)    |
| Director—Positive ( $\beta_5$ )                         | -3.476                     |            |            |
| –Binary                                                 | (2.811)                    |            |            |
| Director History (Role) ( $\beta_6$ )                   |                            | -0.0175*   |            |
| –Million USD                                            |                            | (0.009)    |            |
| Director History (Role)—Positive ( $\beta_7$ )          |                            |            | -0.014     |
| –Million USD                                            |                            |            | (0.009)    |
| Director History (Role)—Negative ( $\beta_8$ )          |                            |            | (0.036)    |
| –Million USD                                            |                            |            | (0.043)    |
| Producer—Positive ( $\beta_9$ )                         | 5.656*                     |            |            |
| –Binary                                                 | (2.749)                    |            |            |
| Producer History (Role) ( $\beta_{10}$ )                |                            | 0.0565***  |            |
| –Million USD                                            |                            | (0.012)    |            |
| Producer History (Role)—Positive ( $\beta_{11}$ )       |                            |            | 0.0489***  |
| –Million USD                                            |                            |            | (0.012)    |
| Producer History (Role)—Negative ( $\beta_{12}$ )       |                            |            | -0.144***  |
| –Million USD                                            |                            |            | (0.030)    |
| Exec. Producer—Positive ( $\beta_{13}$ )                | 8.913**                    |            |            |
| –Binary                                                 | (3.102)                    |            |            |
| Exec. Producer History (Role) ( $\beta_{14}$ )          |                            | 0.0286**   |            |
| –Million USD                                            |                            | (0.009)    |            |
| Exec. Producer History (Role)—Positive ( $\beta_{15}$ ) |                            |            | 0.0370***  |
| –Million USD                                            |                            |            | (0.011)    |
| Exec. Producer History (Role)—Negative ( $\beta_{16}$ ) |                            |            | -0.103**   |
| –Million USD                                            |                            |            | (0.038)    |
| Screenwriter—Positive ( $\beta_{17}$ )                  | 2.316                      |            |            |
| –Binary                                                 | (2.772)                    |            |            |
| Screenwriter History (Role) ( $\beta_{18}$ )            |                            | 0.0403+    |            |
| –Million USD                                            |                            | (0.023)    |            |
| Screenwriter History (Role)—Positive ( $\beta_{19}$ )   |                            |            | 0.031      |
| –Million USD                                            |                            |            | (0.022)    |
| Screenwriter History (Role)—Negative ( $\beta_{20}$ )   |                            |            | -0.114*    |
| –Million USD                                            |                            |            | (0.054)    |
| <b>Controls</b>                                         |                            |            |            |
| Running Time (minutes)                                  | 0.365**                    | 0.312**    | 0.407***   |
|                                                         | (0.112)                    | (0.107)    | (0.111)    |
| Sequel                                                  | 22.35***                   | 14.83*     | 15.61**    |
|                                                         | (6.143)                    | (5.949)    | (5.868)    |
| Opening Weekend Theaters                                | 0.0109***                  | 0.00882*** | 0.00964*** |
|                                                         | (0.002)                    | (0.002)    | (0.002)    |
| Team Familiarity                                        | 1.222*                     | 0.5100     | 0.4850     |
|                                                         | (0.590)                    | (0.585)    | (0.574)    |
| Constant                                                | -53.84*                    | (30.680)   | -45.71+    |
|                                                         | (25.00)                    | (25.36)    | (25.38)    |
| <b>Fixed Effects</b>                                    |                            |            |            |
| Year, Distributor, Genre, Rating                        | Yes                        | Yes        | Yes        |
| Adjusted R-Square                                       | 0.101                      | 0.151      | 0.170      |
| Number                                                  | 2,091                      | 2,091      | 2,091      |

+  $p < 0.10$ , \*  $p < 0.05$ , \*\*  $p < 0.01$ , \*\*\*  $p < 0.001$ . We report coefficient estimates with robust standard errors in parentheses.
